# Supplementary material
Source: PubMed Central journal article supplement (PMC11028292)
Supplement: 262_2018_2174_MOESM1_ESM.pdf [file 262_2018_2174_MOESM1_ESM.pdf]

**Suppl. Fig 1: Cell morphology. Camera shots using a light microscope from (a) lung carcinoma or (b) carcinoma and TIL of patient #2**

**a**

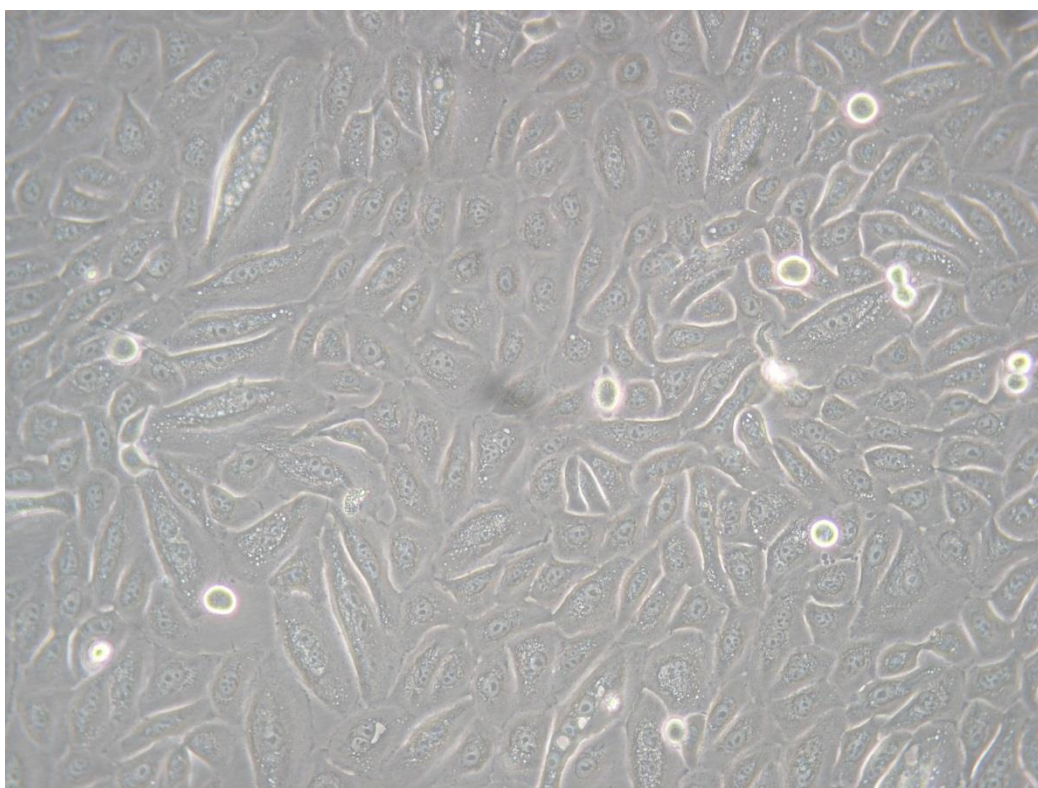

**b**

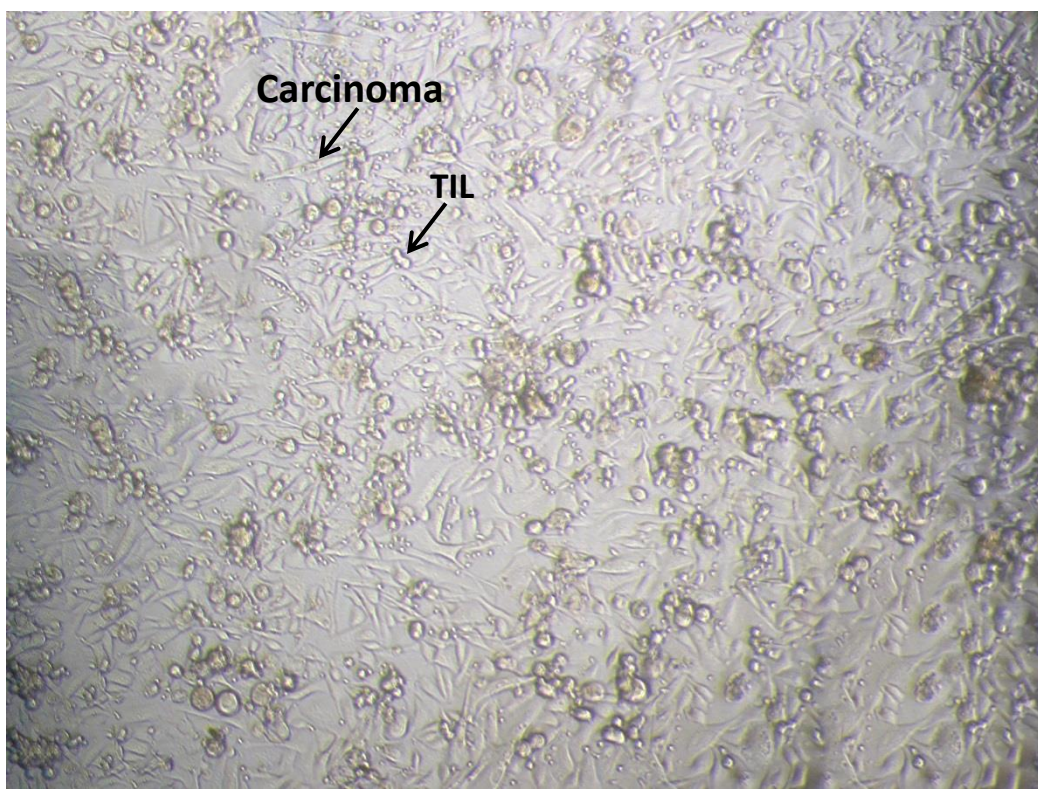

**Suppl. Table 1: NSCLC patients' baseline characteristics and clinical staging**

| <b>Pt.</b> | <b>Age / Gender</b> | <b>Smoker</b> | <b>Primary Tumor</b> | <b>Nodes</b> | <b>Distant metastasis</b> | <b>Tumor volume (cm<sup>3</sup>)*</b> | <b>Carcinoma</b>   | <b>18 months FU</b> |
|------------|---------------------|---------------|----------------------|--------------|---------------------------|---------------------------------------|--------------------|---------------------|
| <b>1</b>   | 68 / M              | yes           | T2a                  | N0           | M0                        | 0.90                                  | acinar adeno       | NED                 |
| <b>2</b>   | 65 / M              | yes           | T2a                  | N0           | M0                        | 3.48                                  | mucin acinar adeno | NED                 |
| <b>3</b>   | 65 / F              | yes           | T2a                  | N0           | M0                        | 0.78                                  | acinar adeno       | Rec                 |
| <b>4</b>   | 64 / M              | yes           | T2a                  | N0           | M0                        | 0.63                                  | squamous cell      | NED                 |
| <b>5</b>   | 69 / M              | no            | T4                   | N0           | M1 (brain)                | 1.90                                  | adeno              | NED                 |

\*available for tumor processing. NED, no evidence of disease; FU, follow up; Rec, recurrence

**Suppl. Table 2: Lung carcinoma establishment.**

| <b>Pt.</b> | <b>Fragment</b> | <b>Digest</b> | <b>TRC</b> | <b>Successful</b> |
|------------|-----------------|---------------|------------|-------------------|
| 1          | no              | no            | no         | no                |
| 2          | no              | <b>yes</b>    | no         | yes               |
| 3          | no              | no            | <b>yes</b> | yes               |
| 4          | <b>yes</b>      | <b>yes</b>    | <b>yes</b> | yes               |
| 5          | no              | no            | no         | no                |
